# Supplementary material for: Nintedanib induces senolytic effect via STAT3 inhibition
Source: PubMed Central journal article supplement (PMC9440251; doi:10.1038/s41419-022-05207-8), 2022-09-02

**Figure 2B**

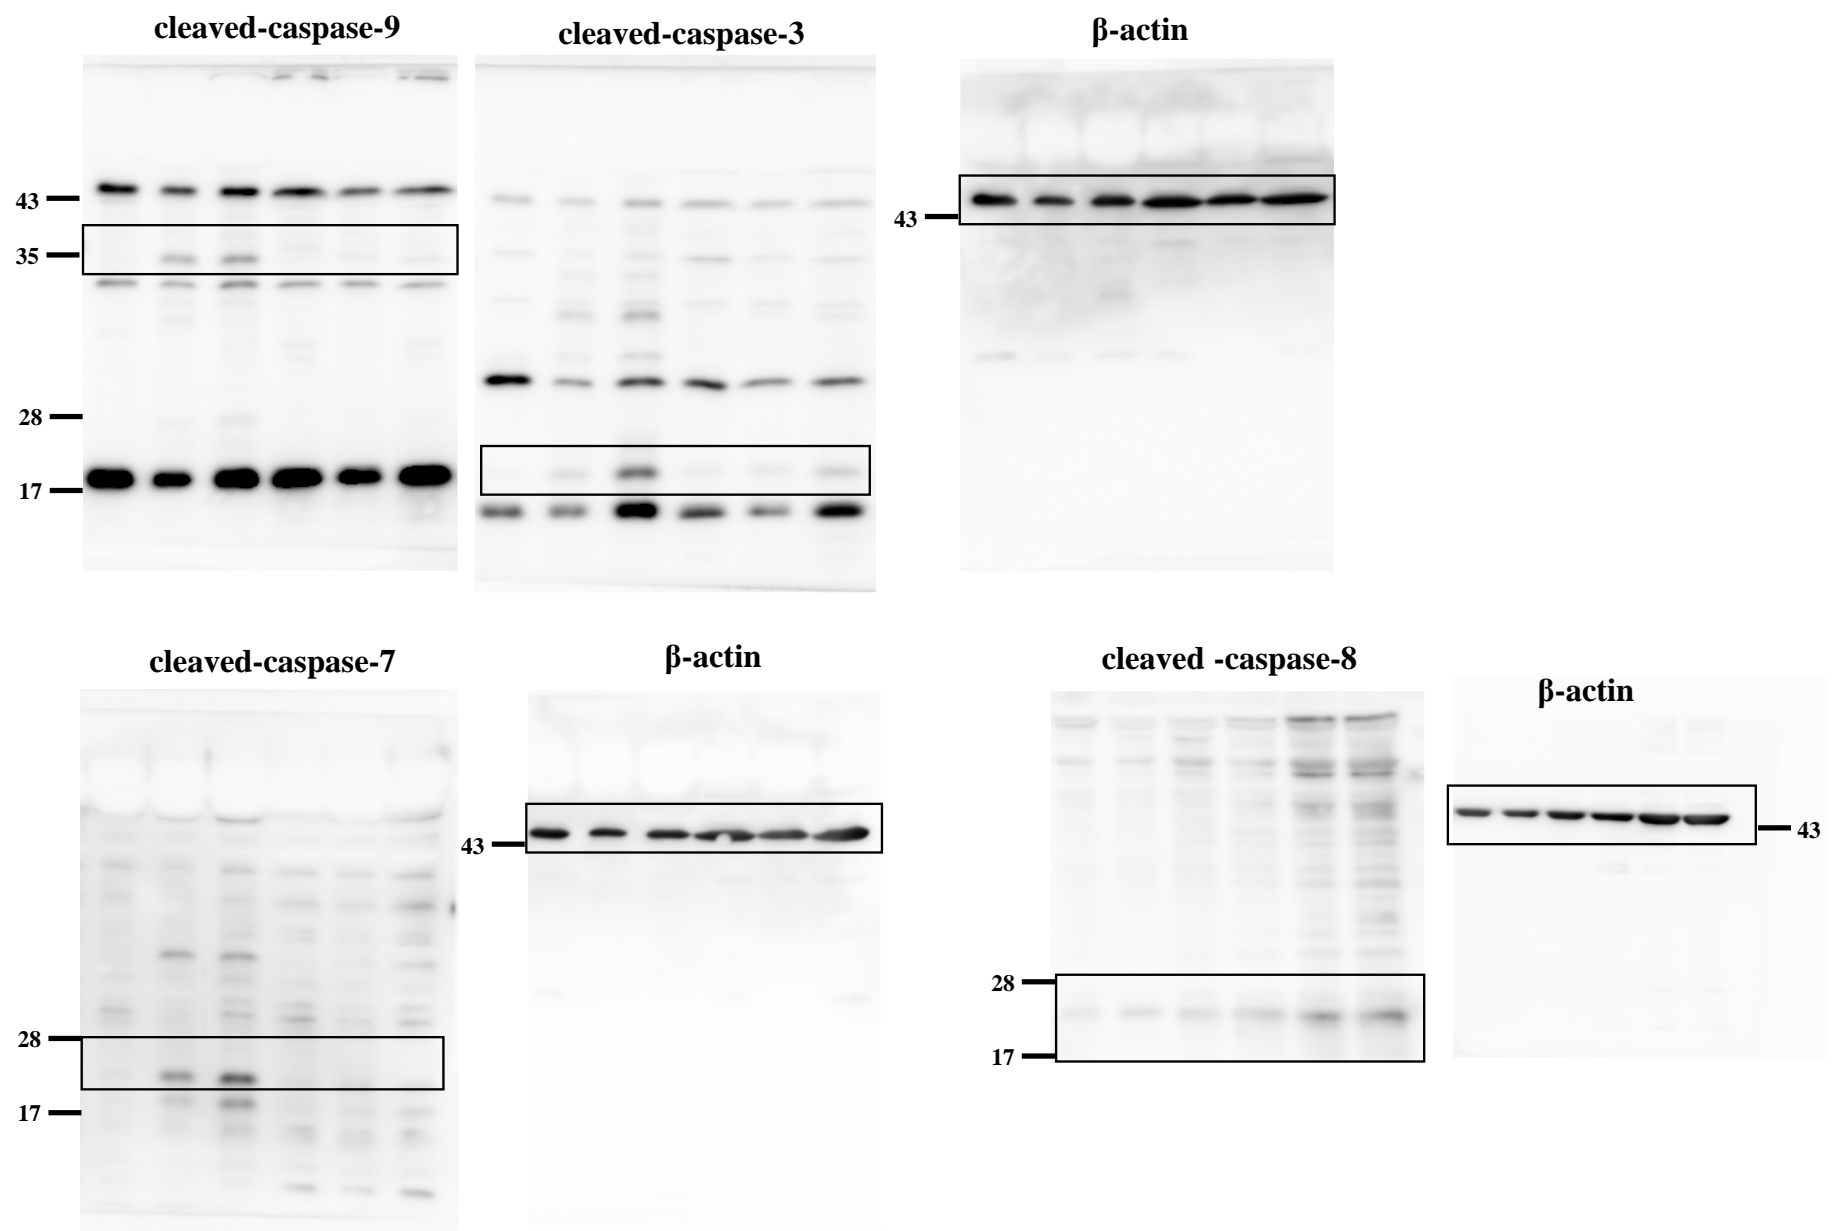

**Figure 3C**

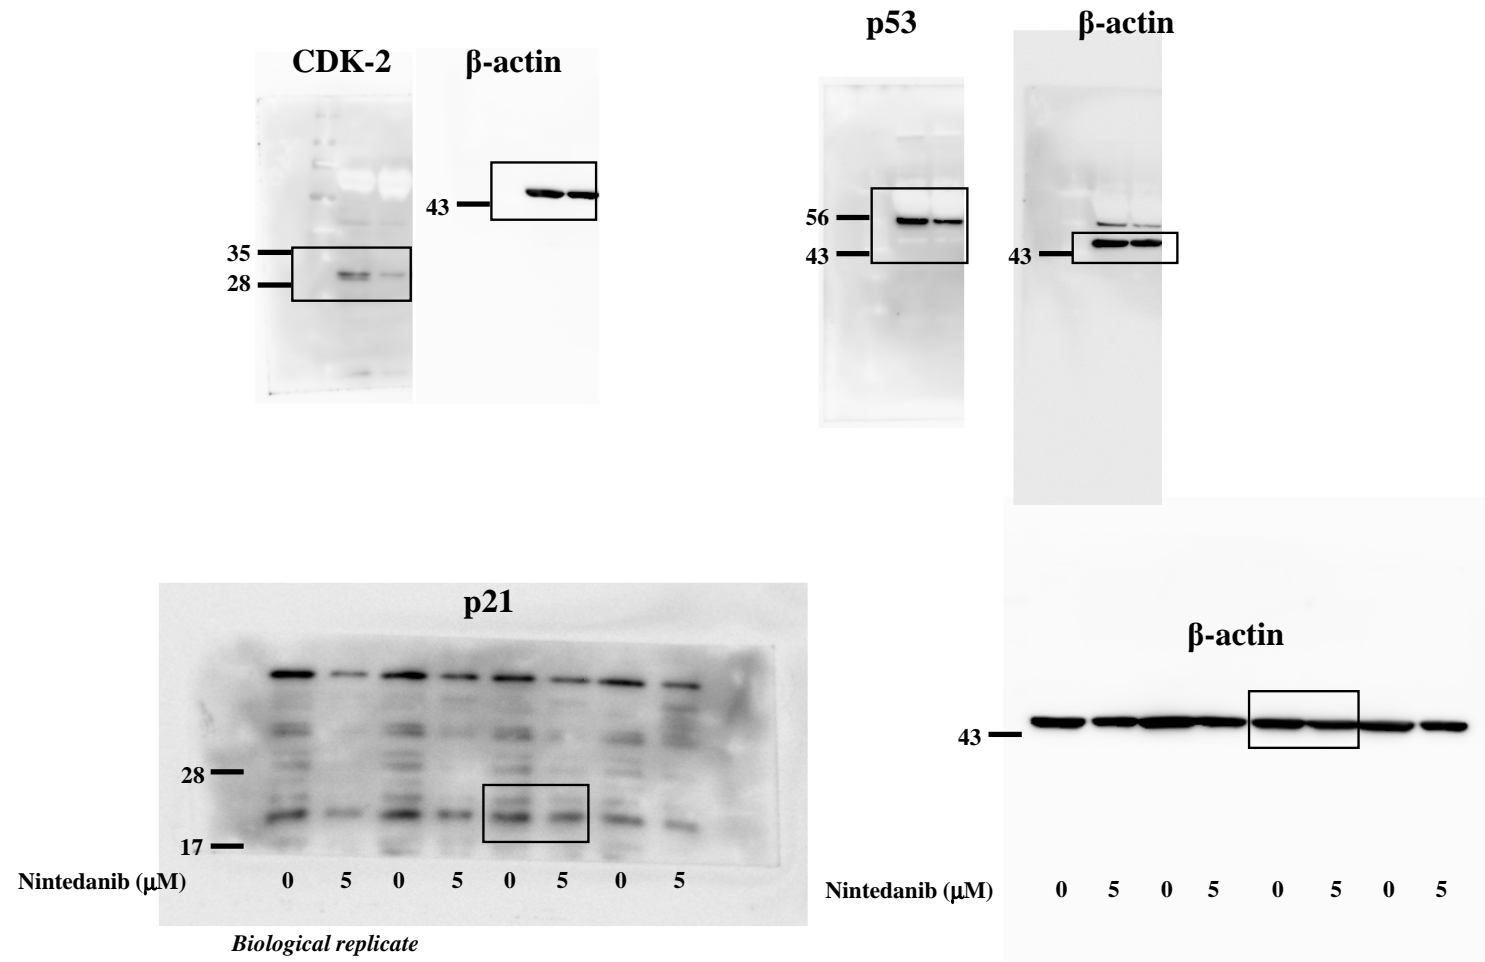

**Figure 3H**

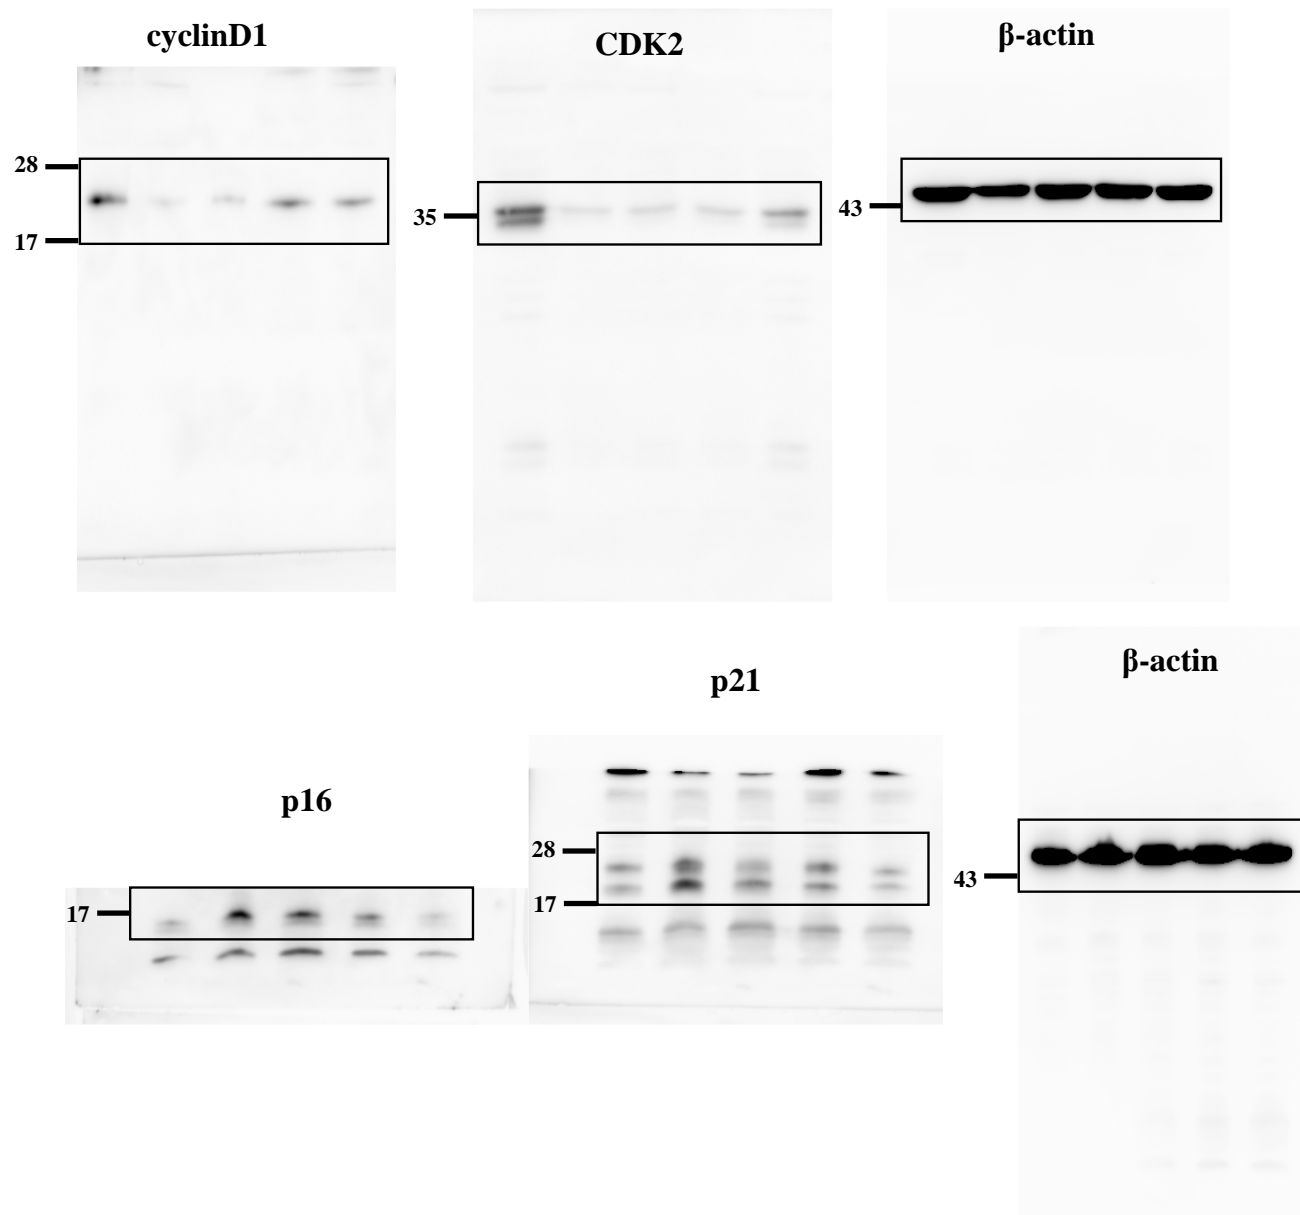

Figure 4A

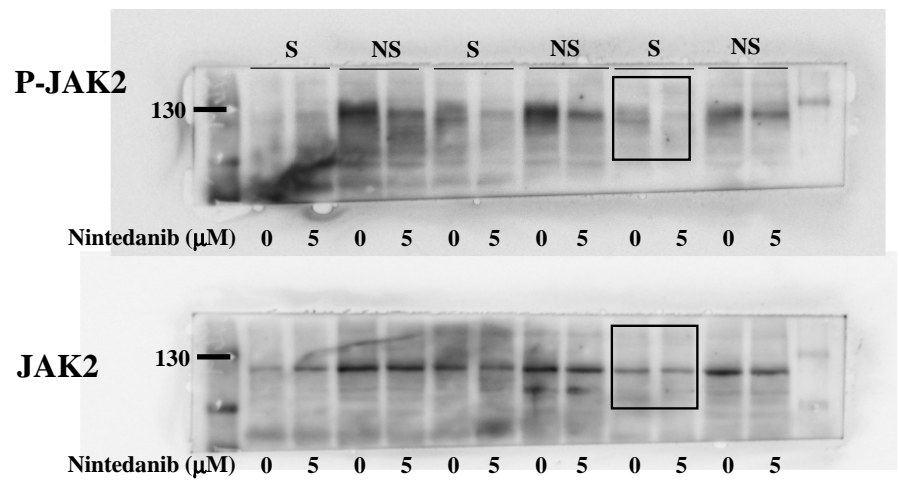

*Biological replicate*

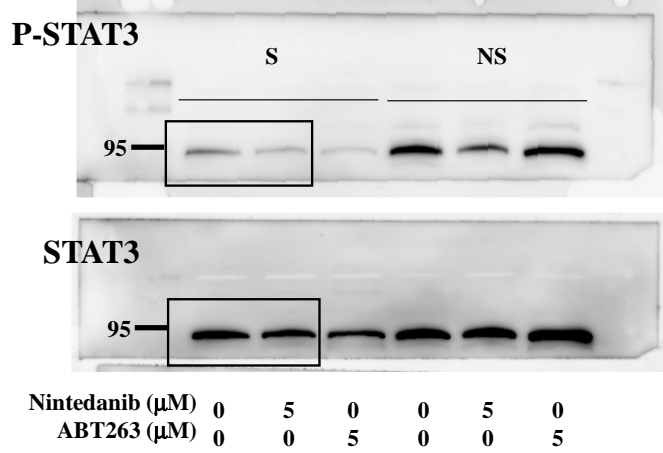

**Figure 4B**

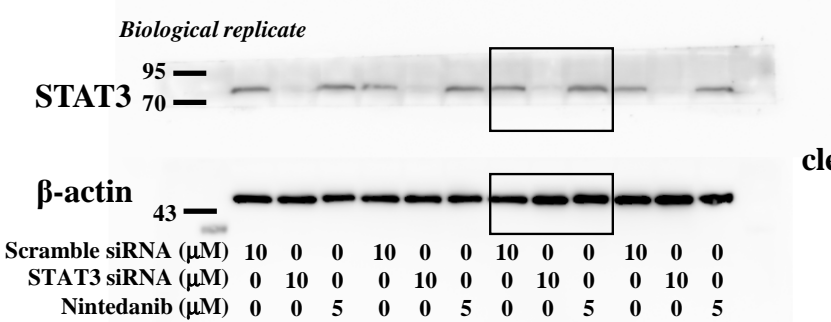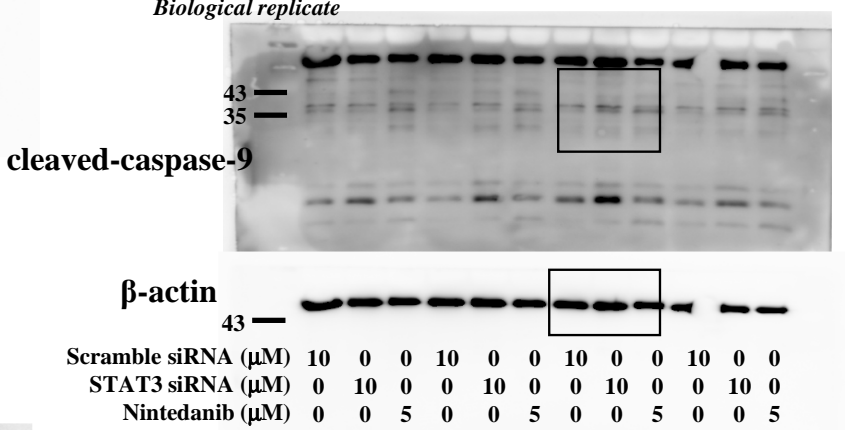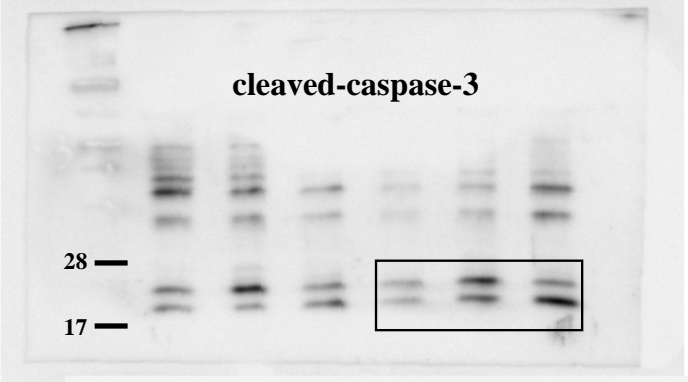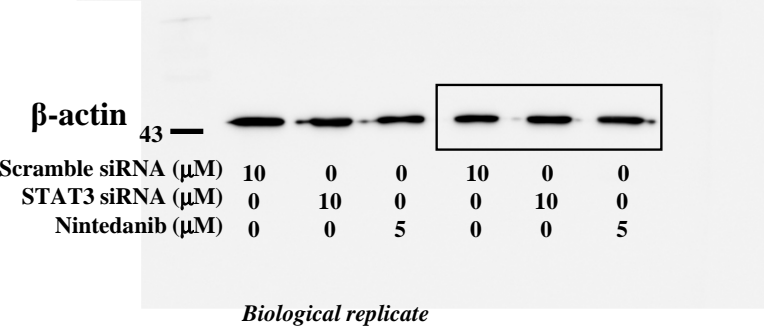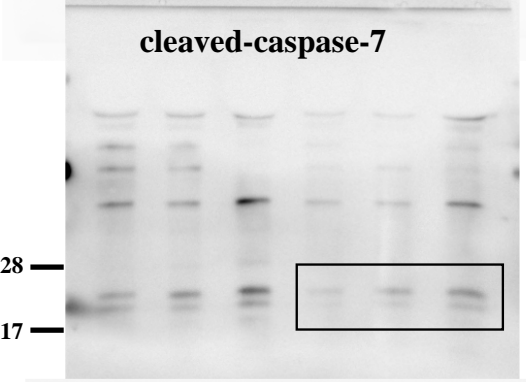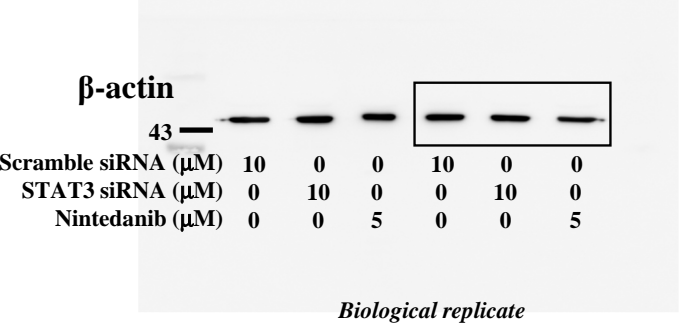

**Figure 5F**

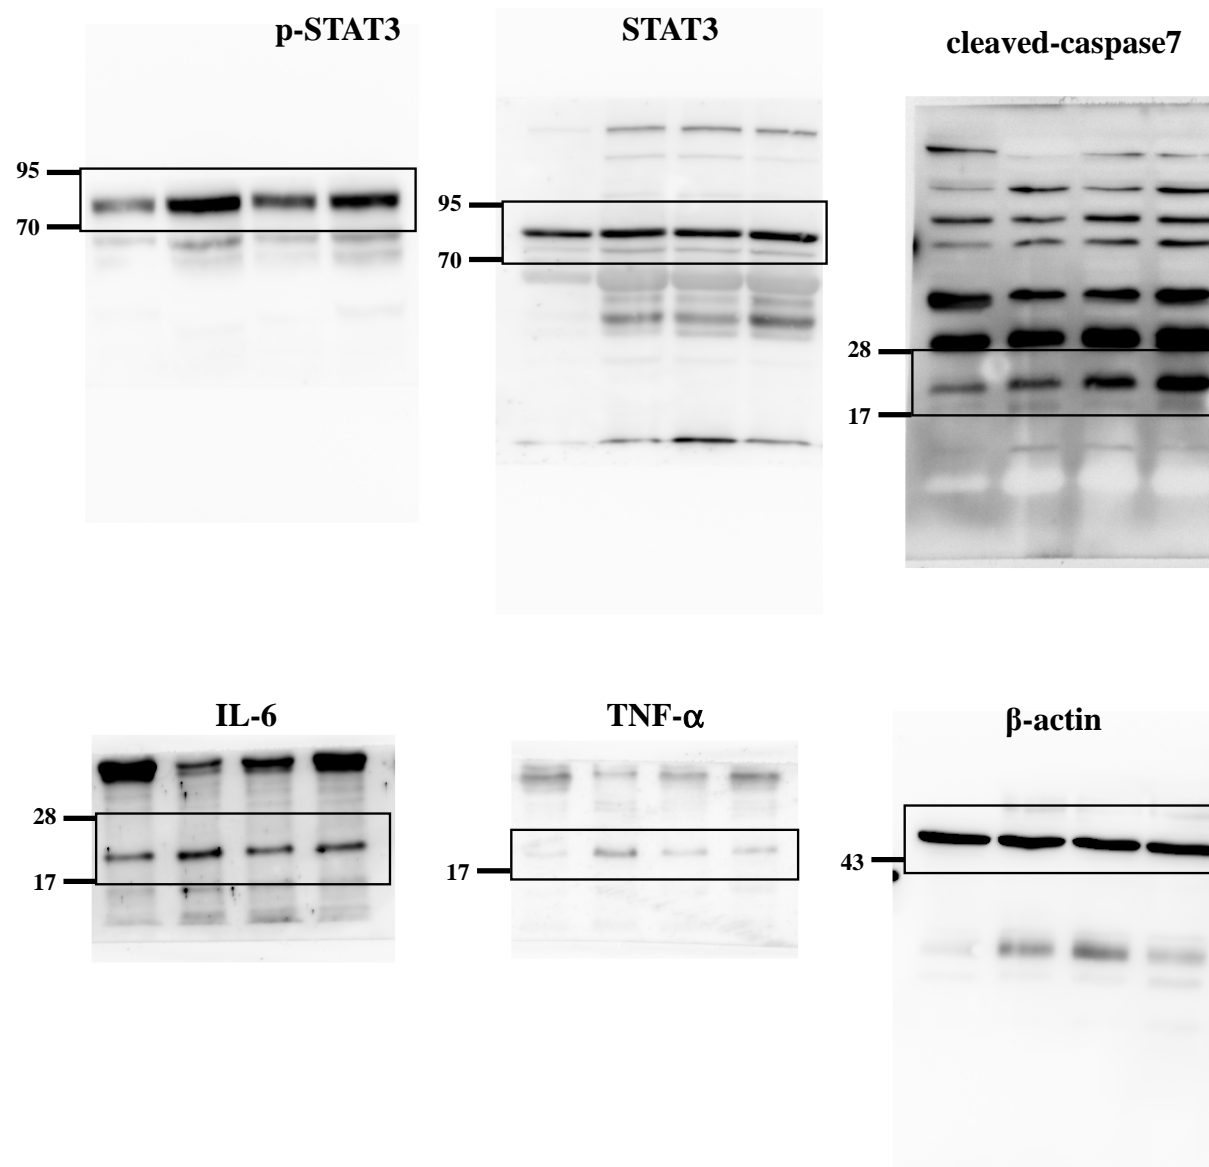

**Figure 5H**

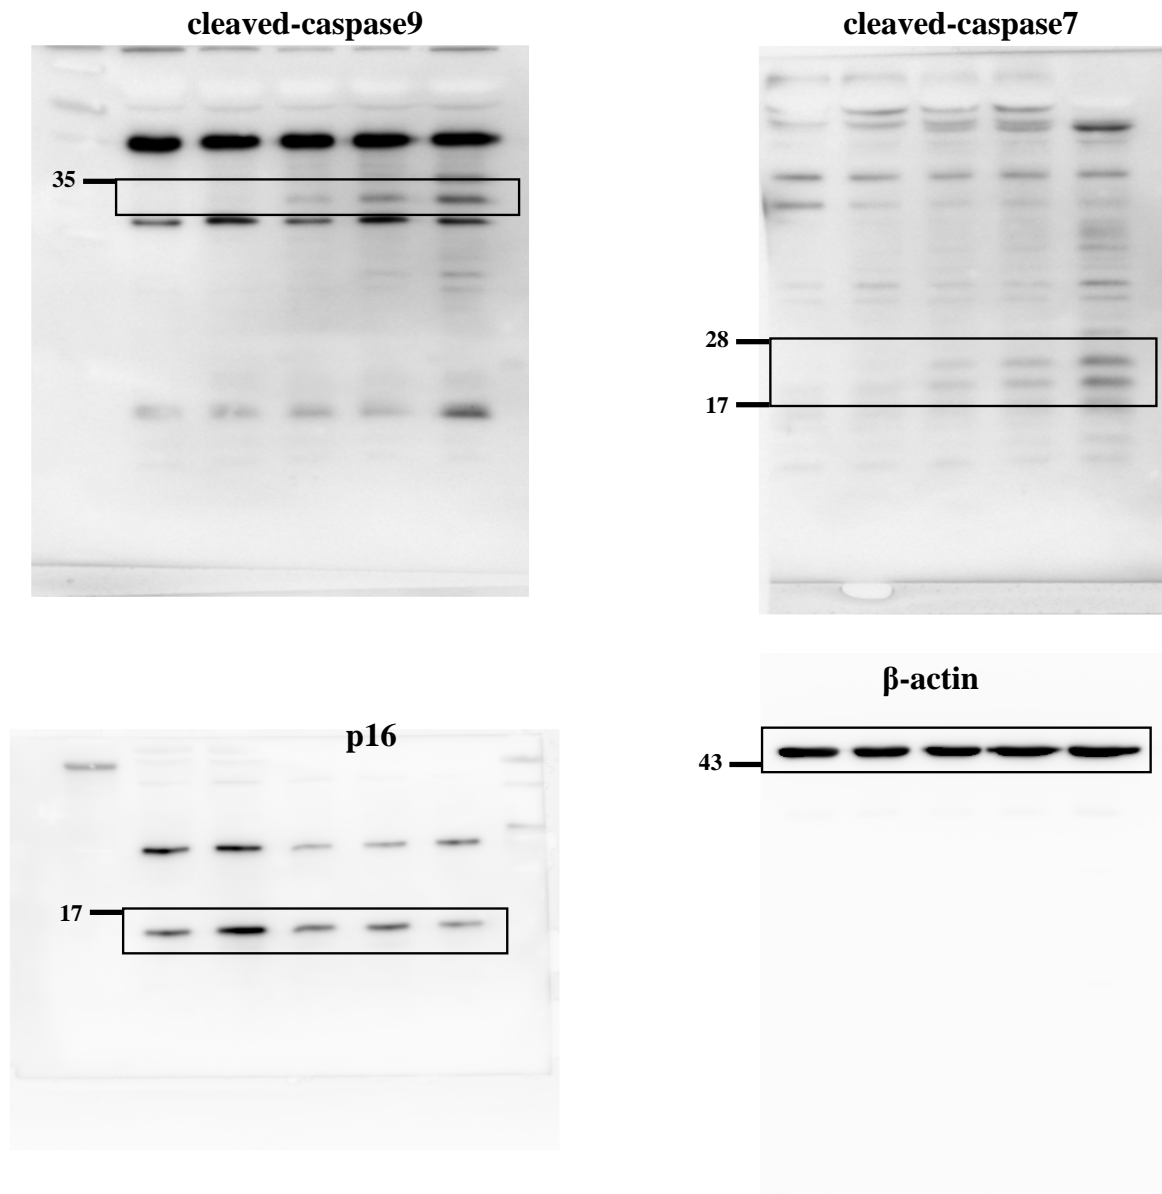

Supplementary Figure 1

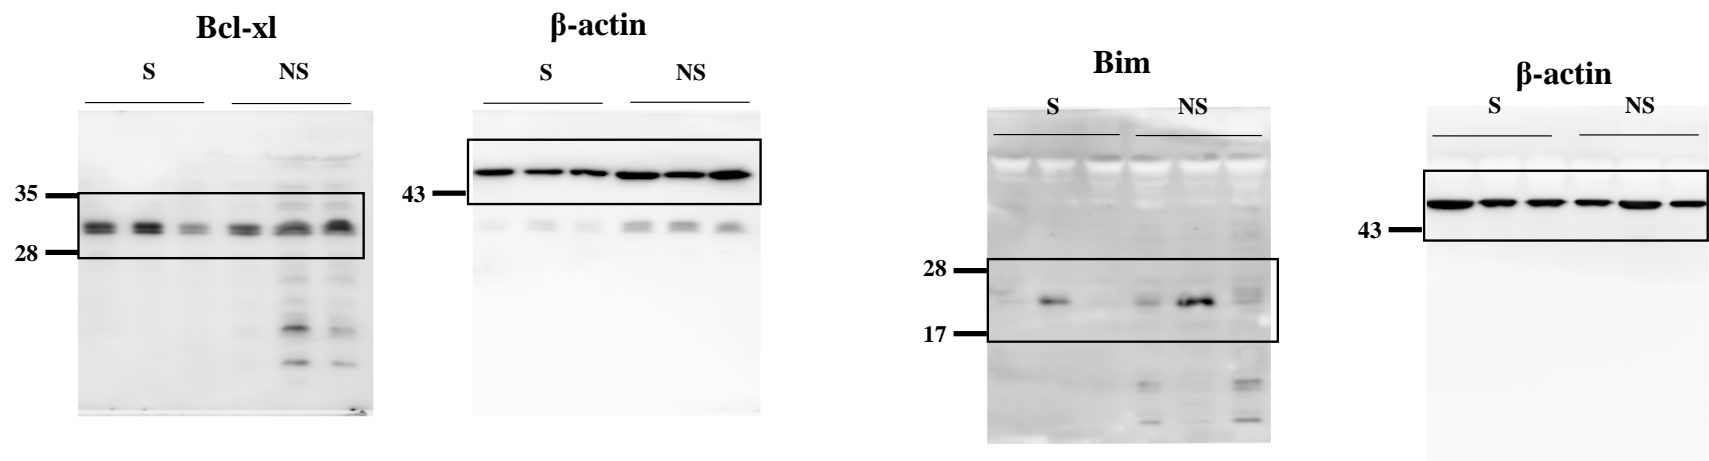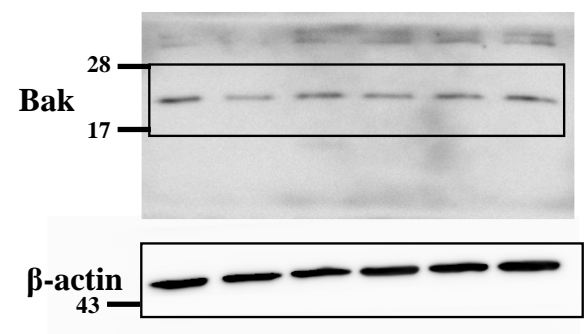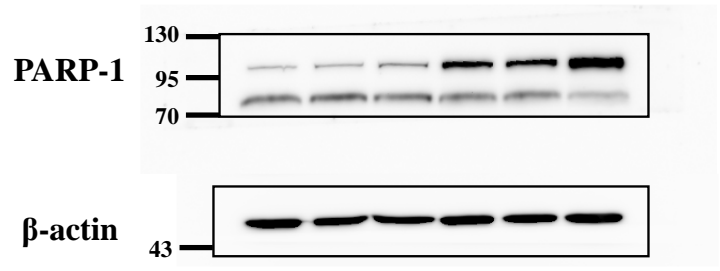



Supplementary Figure 4A

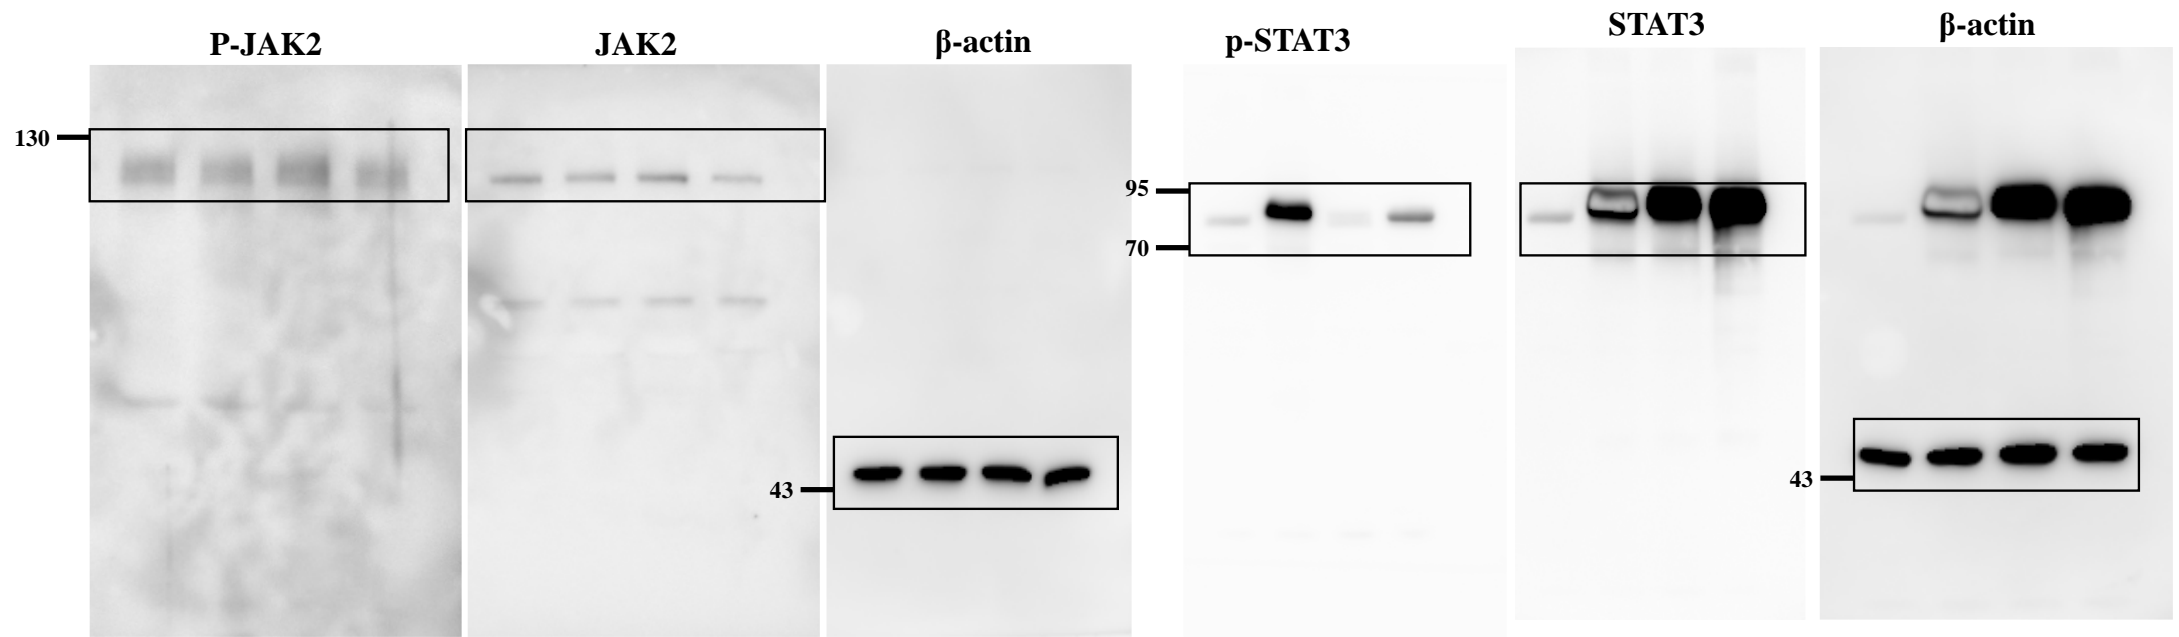

Supplementary Figure 5A

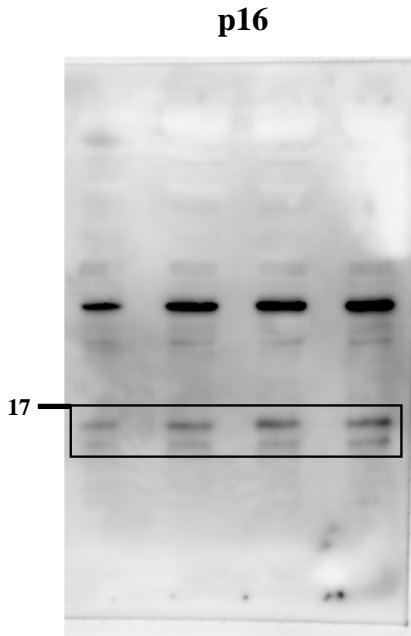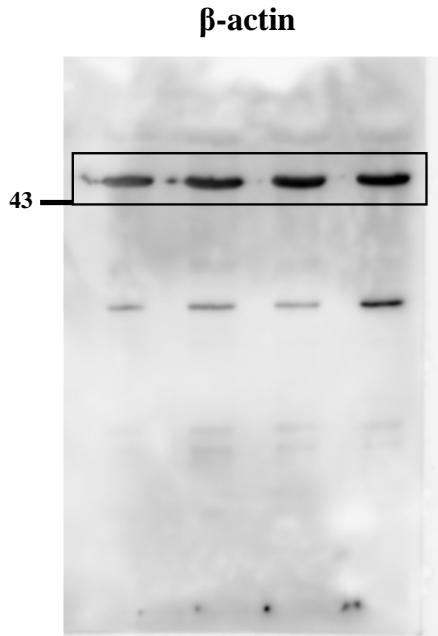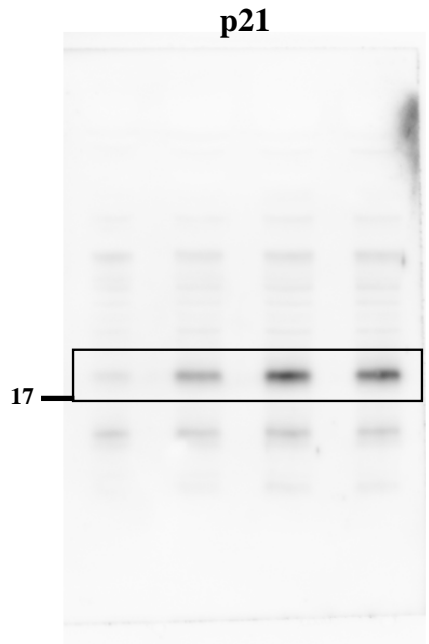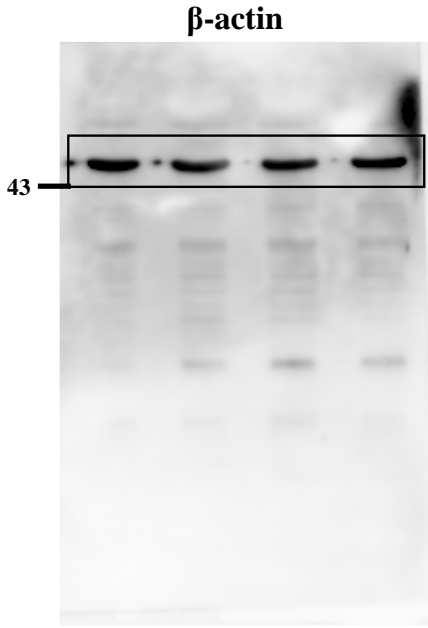

Supplement: 41419_2022_5207_MOESM2_ESM.pdf [file 41419_2022_5207_MOESM2_ESM.pdf]
