# Supplementary material for: Nintedanib induces senolytic effect via STAT3 inhibition
Source: PubMed Central journal article supplement (PMC9440251; doi:10.1038/s41419-022-05207-8), 2022-09-02
Supplement: 41419_2022_5207_MOESM1_ESM.pdf [file 41419_2022_5207_MOESM1_ESM.pdf]

## Supplementary Information

### Nintedanib induces senolytic effect via STAT3 inhibition

Hyun-Ji Cho<sup>1,2,\*</sup>, Jeong-A Hwang<sup>1</sup>, Eun Jae Yang<sup>1</sup>, Eok-Cheon Kim<sup>3</sup>, Jae-Ryong Kim<sup>3</sup>, Sung Young Kim<sup>4</sup>, Young Zoon Kim<sup>5</sup>, Sang Chul Park<sup>6</sup>, Young-Sam Lee<sup>1,2,7,\*</sup>

<sup>1</sup>Department of New Biology, DGIST, Daegu 42988, Korea

<sup>2</sup>Well Aging Research Center, DGIST, Daegu 42988, Korea

<sup>3</sup>Department of Biochemistry and Molecular Biology, Smart-Aging Convergence Research Center, college of Medicine, Yeungnam University, Daegu 42415, Korea

<sup>4</sup>Department of Biochemistry, Konkuk University School of Medicine, Seoul 05029, Korea

<sup>5</sup>Division of Neuro-Oncology and Department of Neurosurgery, Samsung Changwon Hospital, Sungkyunkwan University School of Medicine, Changwon 51353, Korea

<sup>6</sup>The Future life and Society Research Center, Chonnam National University, Gwangju 58128, Korea

<sup>7</sup>New Biology Research Center, DGIST, Daegu 42988, Korea

\* To whom correspondence should be addressed:

Hyun-Ji Cho, Ph.D.

Department of New Biology, DGIST, Daegu 42988, Korea

E-mail: [hjcho.dr@dgist.ac.kr](mailto:hjcho.dr@dgist.ac.kr), Tel: +82-53-785-3307

Young-Sam Lee, Ph.D.

Department of New Biology, DGIST, Daegu 42988, Korea

E-mail: [lee.youngsam@dgist.ac.kr](mailto:lee.youngsam@dgist.ac.kr), Tel: +82-53-785-1880

Running Title: Senolytic effect of nintedanib

This file includes:

Supplementary Figures 1-5

## Supplementary Figures

A

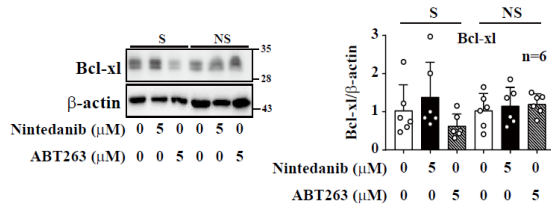

C

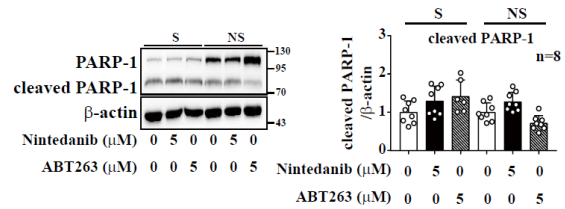

B

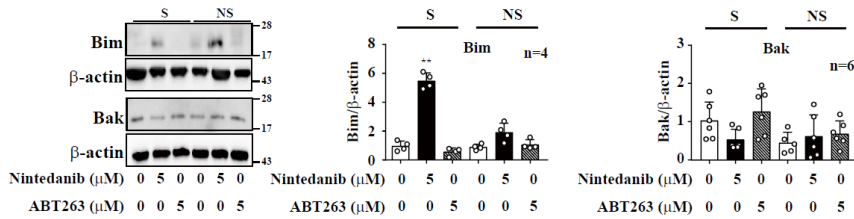

**Supplementary Fig. 1. Nintedanib and ABT263 modulate apoptotic factors in HDFs via different mechanisms.** A to C Senescent (S) and nonsenescent (NS) HDFs were treated with DMSO, nintedanib (5  $\mu$ M), or ABT263 (5  $\mu$ M) for three days, and then western blot assays using anti-Bcl-xL (A), anti-Bim, anti-Bak (B), and anti-PARP-1 (C) antibodies were performed to determine the expression of apoptotic factors. The data normalized to those for DMSO-treated cells are shown as the mean  $\pm$  S.D. \* $p$ <0.05, \*\* $p$ <0.01, \*\*\* $p$ <0.001 by one-way ANOVA with Tukey's post hoc test.

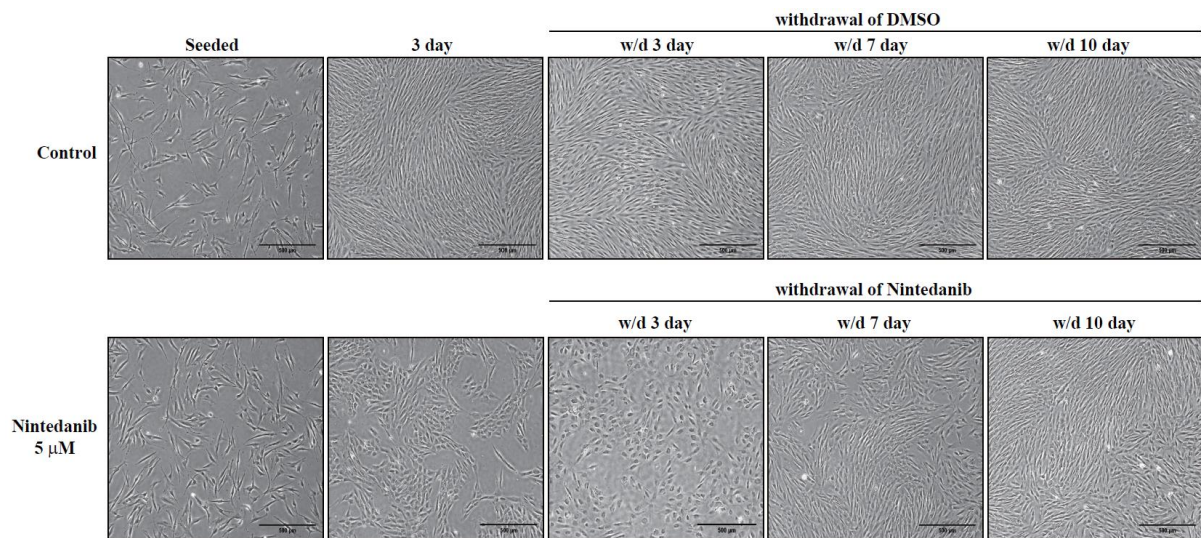

**Supplementary Fig. 2 Nintedanib-induced arrested cell proliferation in nonsenescent HDFs is restored after the drug withdrawal.** Cell morphological changes after nintedanib removal. DMSO or nintedanib (5 μM) was treated for the first 3 days, and then, the HDFs were cultured in complete growth medium from 3 to 10 days after chemical removal. Scale bar, 500 μm.

**A**

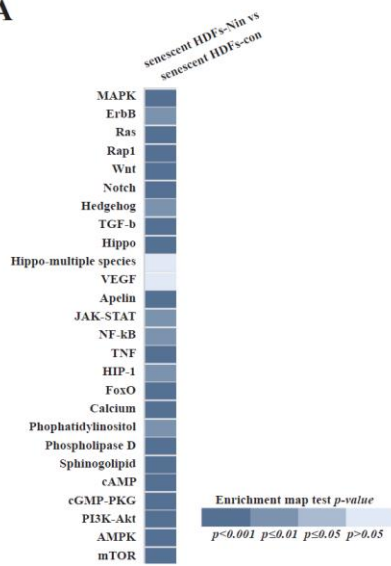

**B**

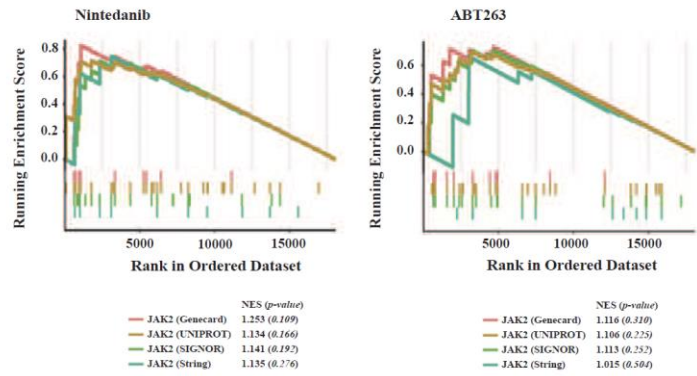

**C**

| Gene list |         |          |         |        |        |
|-----------|---------|----------|---------|--------|--------|
| Genecard  | UNIPROT |          | SIGNOR  |        | String |
| EPOR      | SLC40A1 | LYN      | MAPK3   | CSF2RB | STAT5A |
| LYN       | IL5RA   | SIRPA    | IL6ST   | STAT5A | LEPR   |
| SIRPA     | MPL     | SH2B1    | LEPR    | STAM2  | STAT5B |
| SH2B1     | CSF2RB  | TEC      | CCR2    | IL6R   | STAT1  |
| TEC       | TYK2    | IL23R    | CTLA4   | IL5RA  | STAT3  |
| IL23R     | JAK1    | SKB1     | PRMT5   | IL10RA | EPOR   |
| SKB1      | NCK1    | STAM2    | EZH2    | IL4R   | IRS1   |
| STAM2     | ROCK2   | LEPR     | GAB2    | ITGB2  | SOCS3  |
| IFNGR2    | EPOR    | HSP90AB1 | STAT4   | IFNGR1 | SOCS1  |
| HSP90AB1  | PTPN11  | STRA6    | STAT1   | ITGAL  | PTPN11 |
| STRA6     | SOCS3   | RHEX     | STAT3   | IFNGR2 |        |
| RHEX      | PTPN6   | ASB2     | MAP3K5  | CSF2RA |        |
| ASB2      | PIK3R1  | IL6ST    | ARHGEF1 |        |        |
|           | FYN     | GHR      | ATO1    |        |        |
|           | IL12RB2 | STAT5B   | STAT6   |        |        |
|           | IFNGR2  | STAT5A   | STAT5B  |        |        |
|           | IFNGR1  | PIK3CA   |         |        |        |

**Supplementary Fig. 3 JAK-STAT3 pathway is one of nintedanib-associated signaling alterations in senescent HDFs.** **A** KEGG pathway in nintedanib-treated senescent cells vs. control-treated senescent cells. **B and C** GSEA (**B**) of transcriptomics data obtained from nintedanib- or ABT263-treated senescent HDFs with JAK2 pathway-related genes listed in various tested databases (**C**). The normalized enrichment score (NES) and p value are indicated at the bottom of the corresponding figures.

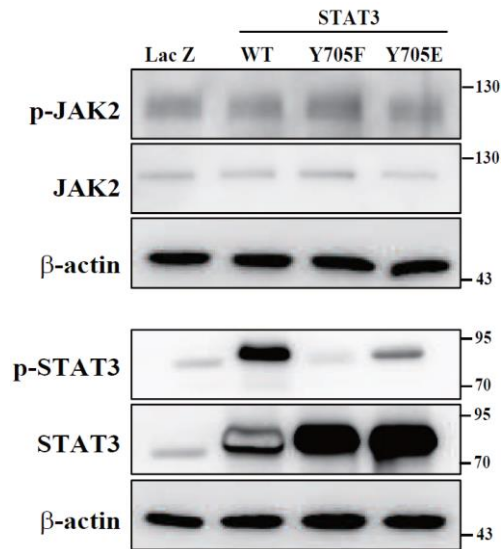

**Supplementary Fig. 4 Immunoblots for validating STAT3 overexpression constructs.**

Nonsenescent HDFs were infected with lentiviral particles to overexpress LacZ, wild-type (WT) STAT3, or mutants STAT3 (Y705E or Y705F) proteins. Western blot assays using anti-p-JAK2, anti-JAK2, anti-p-STAT3, and anti-STAT3 antibodies were performed to determine the lentiviral transduction efficiency.

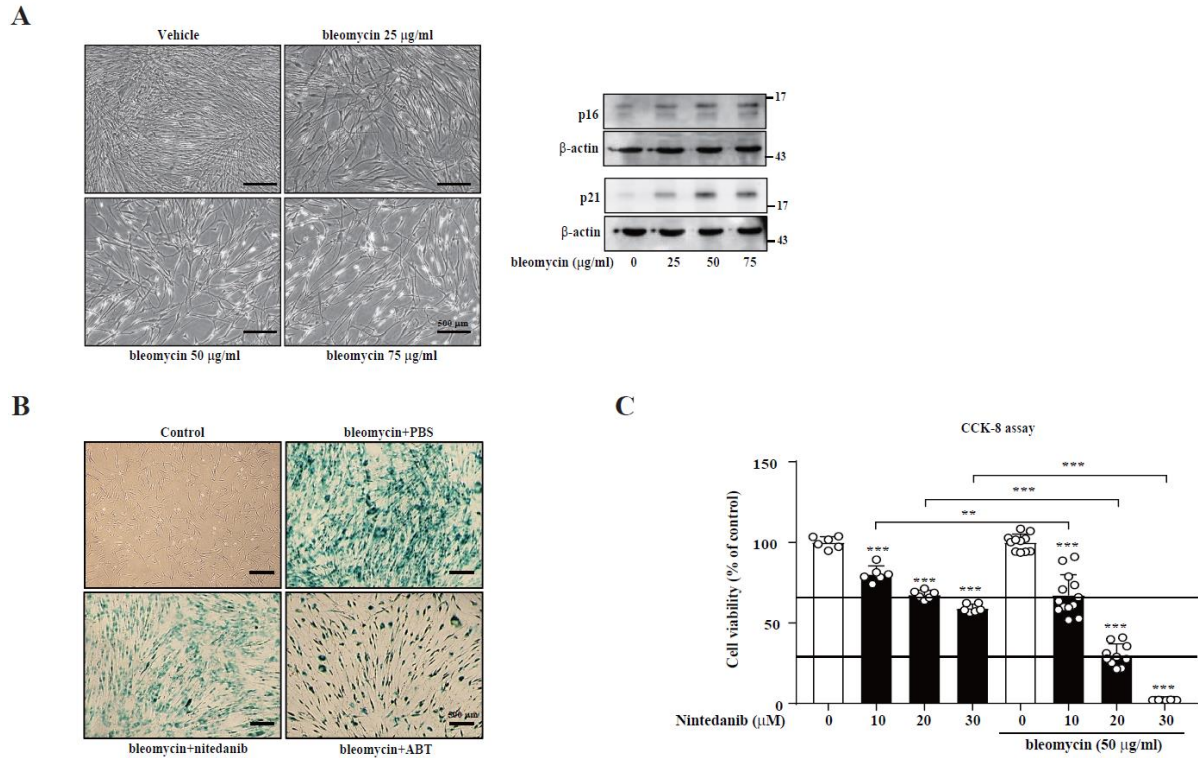

**Supplementary Fig. 5 Nintedanib shows senolytic effects on bleomycin-induced cellular senescence of human pulmonary fibroblasts (HPFs).** **A** Nonsenescent HPFs were treated with bleomycin (25, 50, and 75 µg/ml) for 5 days, and then we confirmed cell morphological changes. Images were randomly captured (left panel). Western blot assays using anti-p16, and anti-p21 antibodies were performed to confirm bleomycin-induced cellular senescence (right panel). **B** Bleomycin-induced senescent HPFs were treated with 10 µM nintedanib, and 5 µM ABT263 for 3 days. SAβG staining was performed to measure the number of senescent cells. **C** Bleomycin-induced senescent HPFs were treated with nintedanib (10, 20, and 30 µM) for 3 days and then CCK-8 assays were performed to determine cell viability. Scale bar, 500 µm. The data normalized to those for DMSO-treated cells are shown as the mean ± S.D. \* $p < 0.05$ , \*\* $p < 0.01$ , \*\*\* $p < 0.001$  by one-way ANOVA with Tukey's post hoc test.
